# Supplementary material
Source: PubMed Central journal article supplement (PMC8455700)

## ddMVAC vs. atezolizumab

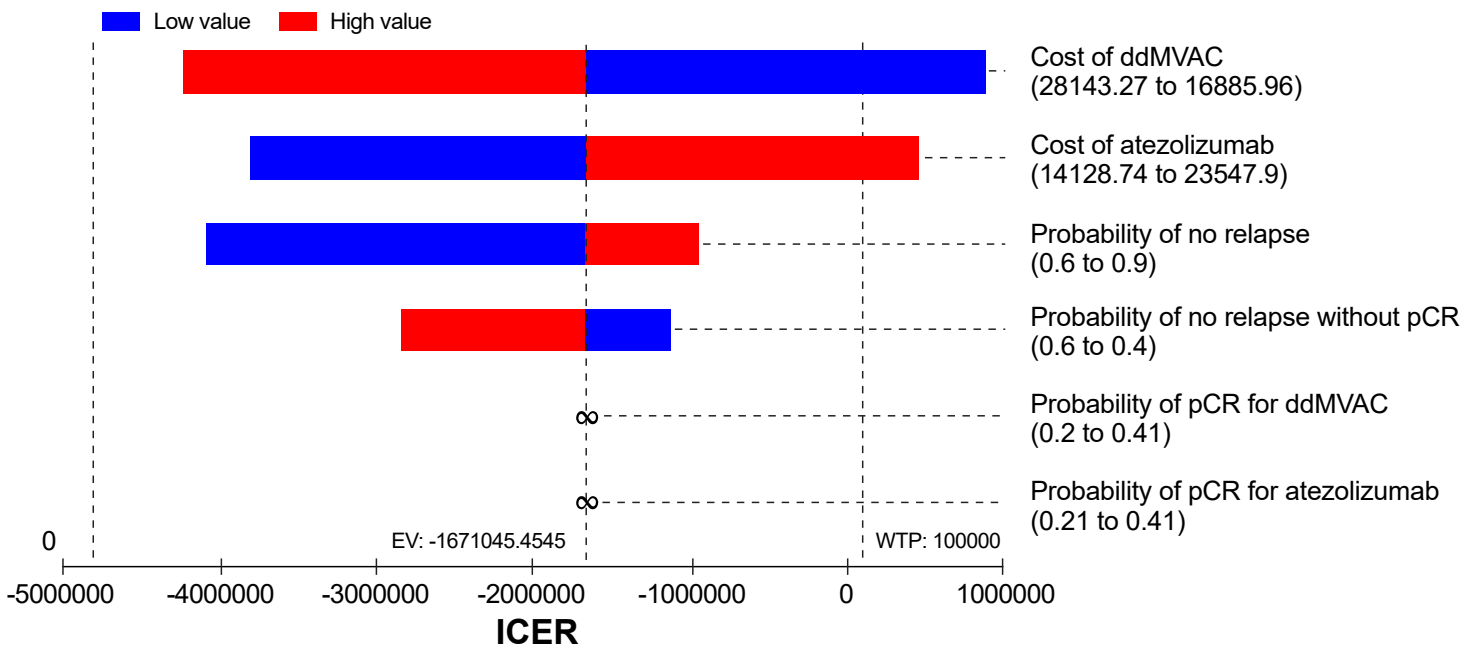

Supplement: NIHMS1685019-supplement-1.pdf [file NIHMS1685019-supplement-1.pdf]

## ddMVAC vs. ipilimumab + nivolumab

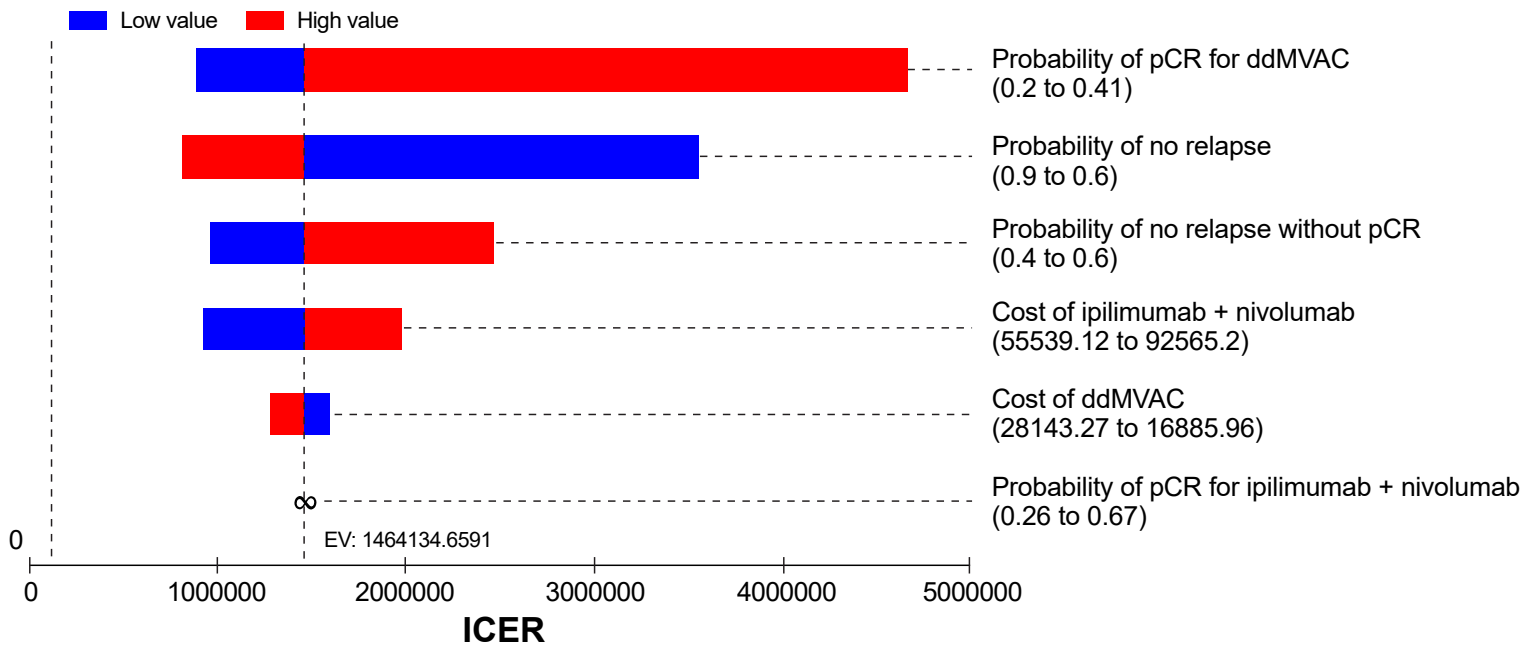

Supplement: NIHMS1685019-supplement-2.pdf [file NIHMS1685019-supplement-2.pdf]

## gem/cis vs. pembro

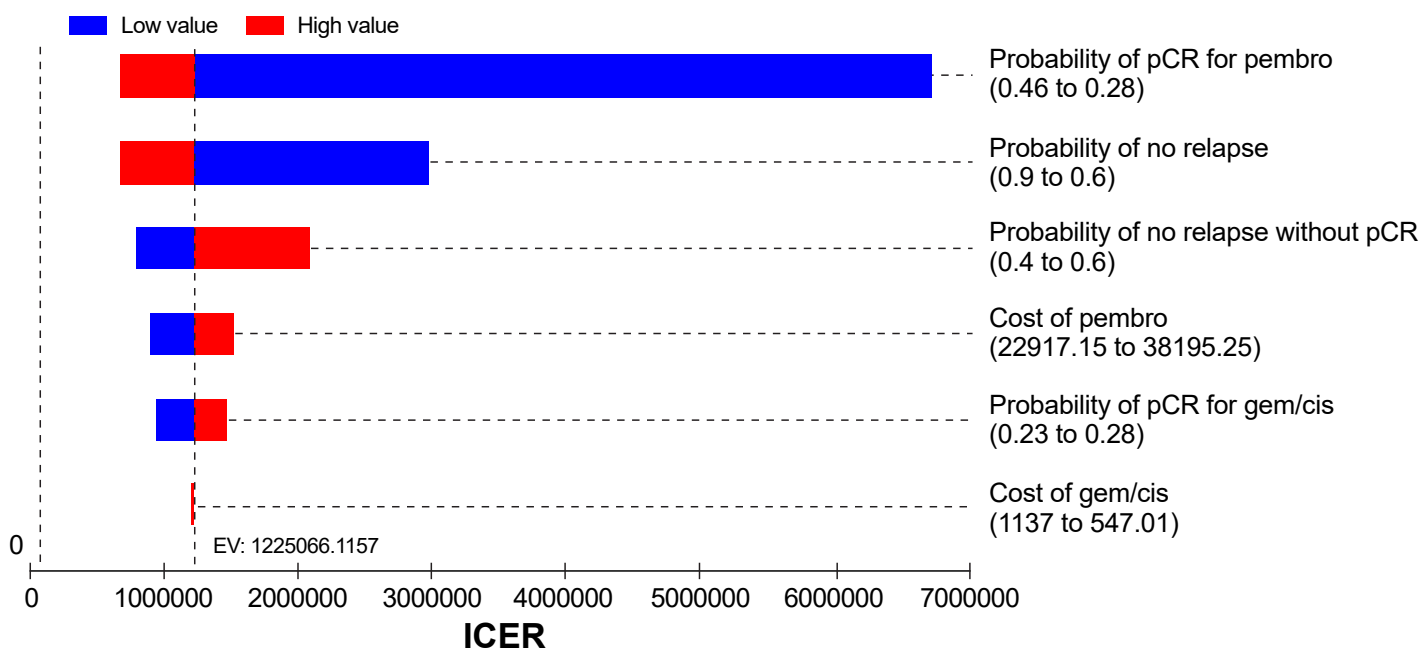

Supplement: NIHMS1685019-supplement-3.pdf [file NIHMS1685019-supplement-3.pdf]

## gem/cis vs. atezolizumab

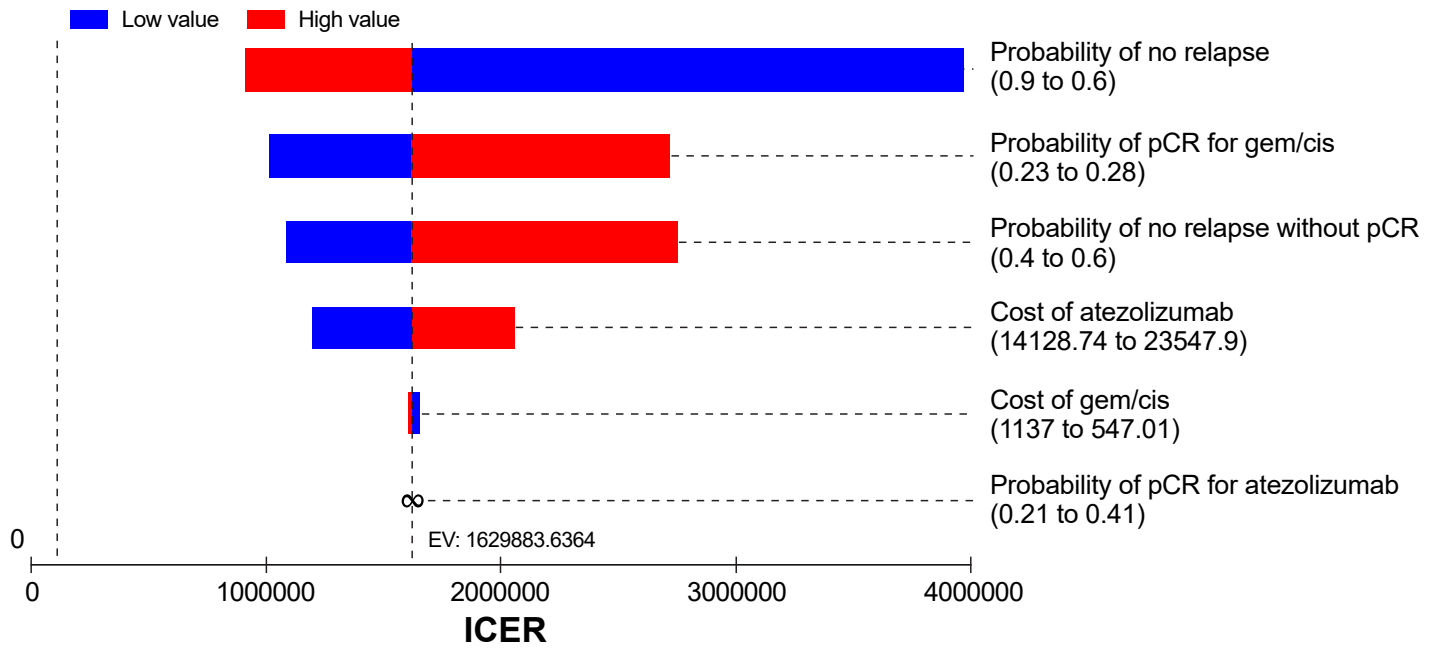

Supplement: NIHMS1685019-supplement-4.pdf [file NIHMS1685019-supplement-4.pdf]

# gem/cis vs. ipilimumab + nivolumab

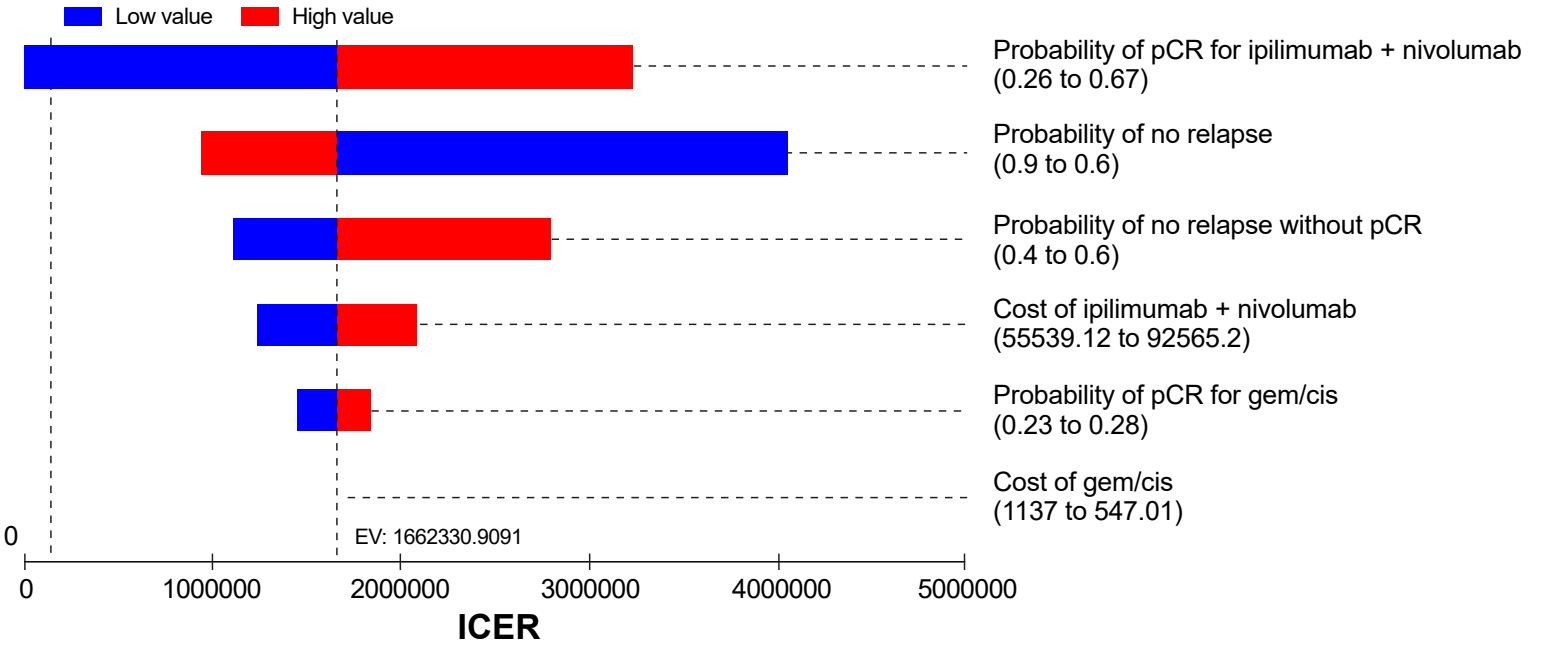

Supplement: NIHMS1685019-supplement-5.pdf [file NIHMS1685019-supplement-5.pdf]
